# Supplementary material
Source: PubMed Central journal article supplement (PMC3069535)
Supplement: NIHMS244844-supplement-supplement_1.pdf [file NIHMS244844-supplement-supplement_1.pdf]

**SUPPLEMENTAL TABLE 1: List of primers used for RT-PCR.**

| <b>LR<br/>P</b> | <b>PRIMER</b>                                      | <b>REFERENCE</b>         |
|-----------------|----------------------------------------------------|--------------------------|
| LDL<br>R        | 5'-CTGTCCCCCAAGACGTG-3'                            | (Mesli et al., 2004)     |
|                 | 5'-CCATCTAGGCAATCTCGGTCTC-3'                       | (Mesli et al., 2004)     |
| VLD<br>LR       | 5'- CAGCAGTATCAGAAGTCAGTGTTTC-3'                   | Primer3/CLC/ IDT         |
|                 | 5'-CAGGTCCTCTTCAGTGGTCTTC-3'                       | Primer3/CLC/ IDT         |
| APO<br>ER2      | 5'-CAACCACTCCCAGCATT-3'                            | Primer3/CLC/ IDT         |
|                 | 5'-CAGTGGGCGATCATAGTTG-3'                          | Primer3/CLC/ IDT         |
| LRP1            | 5'-AGTGCTGCCAGACACAGCTCAAGTGTG-3'                  | (Li et al., 2005)        |
|                 | 5'-CACCAAGCTGGTGGATAGCAAGATCGTG-3'                 | Primer3/CLC/ IDT         |
| LRP1<br>B       | 5'- TTTTGAATTCTCCAGGTACATAGGGGGAGGGTCCAGTGCTTTC-3' | (Marschang et al., 2004) |
|                 | 5'- AATTGGATCCTTATGCTACTGTTTCTCTGATGCCAATTC-3'     | (Marschang et al., 2004) |
| LRP2            | 5'- CCTTGCCAAACCCTCTGAAAAT-3'                      | (Gerbe et al., 2008)     |
|                 | 5'- CACAAGGTTTGCGGTGTCTTTA-3'                      | (Gerbe et al., 2008)     |
| LRP4            | 5'- CAGTGAAGATGTAAAGTGG-3'                         | (Yamaguchi et al., 2006) |
|                 | 5'- ATGCCTGGCTGCTGATCTCTG-3'                       | (Yamaguchi et al., 2006) |
| LRP5            | 5'- TGTACTGCAGCTTGGTCCC-3'                         | (Holmen et al., 2004)    |
|                 | 5'- CCAGTAAATGTCGGAGTCTACAATG-3'                   | (Holmen et al., 2004)    |
| LRP6            | 5'- TGA CTATGCTCCTAGCCGGA-3'                       | (Harwood et al., 2008)   |
|                 | 5'- CAGCACCCACCCACTTTATAA-3'                       | (Harwood et al., 2008)   |
